# Supplementary material for: Dynamic Changes of Gut Microbial Communities of Bumble Bee Queens through Important Life Stages
Source: PubMed Central journal article supplement (PMC6906740; doi:10.1128/msystems.00631-19), 2019-12-10
Supplement: mSystems.00631-19-sf002.pdf [file mSystems.00631-19-sf002.pdf]

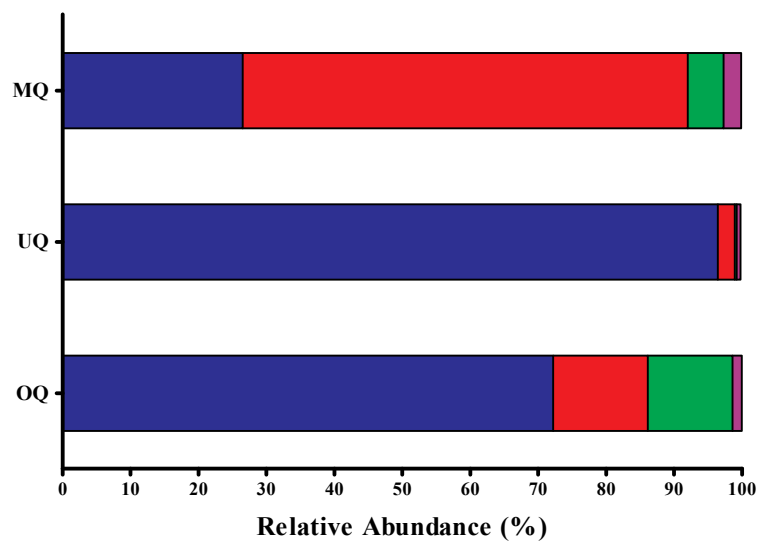

■ Proteobacteria   ■ Firmicutes   ■ Actinobacteria   ■ Bacteroidetes
